# Supplementary material for: Rapid preparation of a Nafion/Ag NW composite film and its humidity sensing effect
Source: Royal Society of Chemistry journal article supplement (doi:10.1039/d0ra01650k), 2020-01-01
Supplement: d0ra01650k1.pdf [file d0ra01650k1.pdf]

## Supporting Information for

### Rapid preparation of Nafion/AgNWs composite films and its humidity sensing effect

Yanjie Wang<sup>\*a,d</sup>, Jiale Wang<sup>a</sup>, Muyu Hao<sup>a</sup>, Bo Li<sup>\*b</sup>, Zicai Zhu<sup>b</sup>, Xiaofan Gou<sup>c</sup> and Lijie Li<sup>d</sup>

<sup>a</sup>College of Mechanical and Electrical Engineering, Hohai University, Changzhou campus, Changzhou, 213022, China

<sup>b</sup>Shaanxi Key Lab for Intelligent Robots, State Key Laboratory for Manufacturing System Engineering, College of Mechanical Engineering, Xi'an Jiaotong University, Xi'an, 710049, China

<sup>c</sup>College of Mechanics and materials, Hohai University, Nanjing, 210098, China

<sup>d</sup>Multidisciplinary Nanotechnology Centre and SPECIFIC, College of Engineering, Swansea University, Swansea, SA1 8EN, United Kingdom

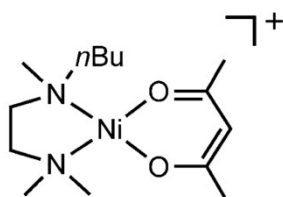

Figure S1. Structural formulae of cationic Ni(II) complexes

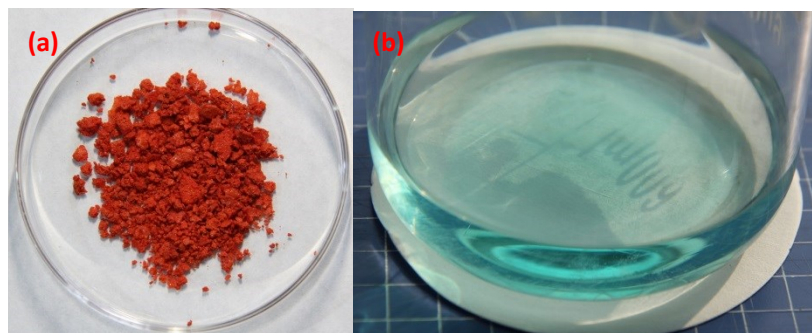

Figure S2. Images of crystal cationic Ni(II) complexes(a) and its solution(b)

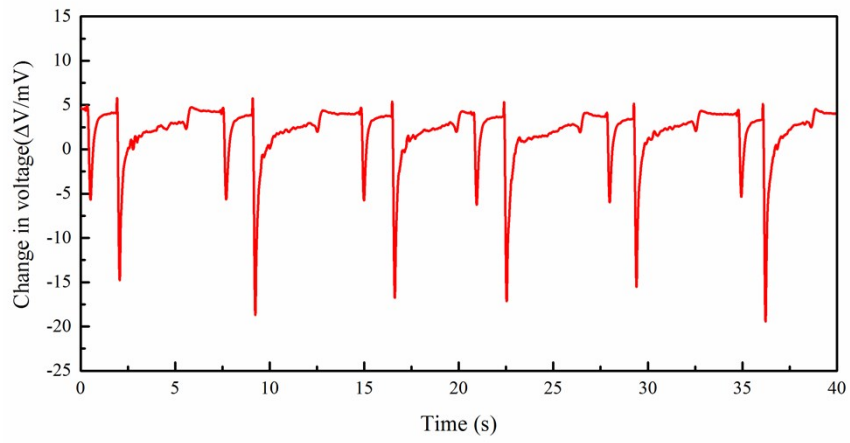

Figure S3 Breathing test of 100% alcohol

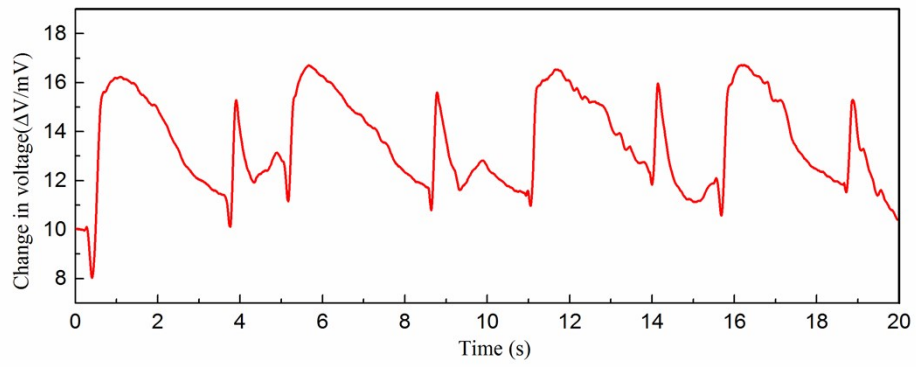

Figure S4 Breathing test of Chinese wine (53% ethanol content)
